## Nanophotonics - Instructions for Authors

### I. Editorial policy

Nanophotonics is a peer-reviewed journal which publishes 4 article types. Manuscripts are independently reviewed by peers selected by the Editors. Decisions are reached as quickly as possible. Nanophotonics aspires to notify authors within 4 weeks from submission date. When manuscripts are accepted subject to revision, the revised manuscript should be returned within approx. 2 months. Accepted papers are promptly published online ahead-of-print as soon as they have been finally processed.

**Reviewers:** The authors should provide the names and e-mail addresses of up to 5 potential reviewers. Authors may also indicate names of reviewers whom they wish to be excluded from reviewing their manuscripts.

**Unpublished material:** Submission of a manuscript to Nanophotonics implies that the work described is not copyrighted, published or submitted elsewhere, except in abstract form. The corresponding author should ensure that all authors approve the manuscript before its submission to Nanophotonics.

**Ethical conduct of research:** The authors must describe and confirm safeguards to meet ethical standards.

**Conflict of interest:** When authors submit a manuscript, they are responsible for recognizing and disclosing financial and/or other conflicts of interest that might bias their work and/or could inappropriately influence his/her judgment. If no specified acknowledgement is given, the Publishers assume that no conflict of interest exists.

**Copyright:** Manuscripts are published with an CC BY license. The copyright stays with the author(s).

### II. Submission of manuscripts

Please submit manuscripts exclusively online at:

<http://mc.manuscriptcentral.com/nanoph/>

**Article Processing Charges:** In order to sustain the production of our fully-refereed open access journal, each article accepted for publication in Nanophotonics is subject to an Article Processing Charge of €1950. This fee is used to cover the costs of the peer-review process, professional typesetting and copyediting, as well as online hosting, long-term preservation, distribution to libraries and content aggregators worldwide, and extensive promotion to potential readers. Information regarding payment of these charges will be provided following acceptance for publication. Inquiries concerning Article Processing Charges should be addressed to the Managing Editor (see contact details below)

**Waiver Policy:** If the submitting author is affiliated with an organization which is listed as an Institutional Member, this membership covers the cost of the Article Processing Charge and the author is exempt of any further expenses. Moreover, Article Processing Charges may be waived for authors who work for institutions in developing countries (countries classified by the World Bank as low-income and lower-middle-income economies). However, other authors who do not fulfill

these criteria can also request a waiver or a discount during the submission process.

**Funding Opportunities:** Authors who are looking for funds to support the payment of Article Processing Charges have a number of options to consider. For details visit our website.

### III. Preparation of manuscripts

**Language:** Manuscripts should be written in clear and concise English. Please have your text proofread by an English native speaker before you submit it for consideration. At the proof stage, only minor changes other than corrections of printers' errors are allowed.

#### General format and length

**Letters** should not exceed 3 printed pages. Each full page of printed text corresponds to approximately 800 words. The Abstract should not exceed 150 words.

**Research Articles** should not exceed more than 5 - 7 printed pages (one printed page holds approx. 800 words or 4000 characters excluding paragraphing, spacing and figures). Articles contain an abstract of approx 250 words, providing a well reflecting summary of the article's included results and conclusion.

**Review Articles** should be submitted only upon invitation of the Editor or the Editorial Board. A Review is to provide the reader with a balanced overview of the broad developments in field and not dominated by the work of a single institute or single author. The level of writing should serve the wide audience of the journal (graduates to post graduate from cross disciplines). The size is between 10 to 20 printed journal pages (one printed page holds approx. 800 words or 4000 characters excluding paragraphing, spacing and figures). Mathematical formulas are limited used, Images and Graphs should be included in extent, to provide an understanding of the text to the wide audience the journal serves. The review contains an abstract of approx. 250 words. The introduction should be short and focus on recent developments and not elaborate on the long historical developments.

**Opinionated Articles** are to summarize a research finding in Nanophotonics and places in a broader context. These can include perspectives on a certain development in the field, the evolution and approaches to unanswered question or cross-field border developments in general. The size is between 2 to 5 printed pages (one printed page holds approx. 800 words or 4000 characters excluding paragraphing, spacing and figures).

**Research Articles and Letters** should have Title page, Abstract, Keywords, Introduction, Materials and methods, Results, Discussion, Acknowledgements and List of non-standard abbreviations, if applicable, References, Table and Figure Legends, if applicable.

**Cover letter:** Each manuscript should be accompanied by a cover letter containing a brief statement by the authors as to the element of novelty of their research.

**References:** References must be numbered consecutively in square brackets [] as they are cited. All references should be collected at the end of the paper. List all authors when there are six or fewer; when there are seven or more, list the first three, followed by "et al."

When citing internet addresses it is important to include the access date as well as the URL.

**Examples:** Book: [1] Hogan B, Costantini F, Lacy E. Manipulating the mouse embryo: A laboratory manual. Cold Spring Harbor, NY, USA, Cold Spring Harbor Laboratory Press, 1986.  
Book chapter: [2] Andrews RK, Berndt MC, López JA. The glycoprotein Ib-IX-V complex. In: Michelson A., ed. Platelets. 2nd ed. San Diego, CA, USA, Academic Press, 2006;145-63.  
Journal article: [3] Bernado P, Blanchard L, Timmins P, Marion D, Ruigrok RW, Blackledge M. A structural model for unfolded proteins from residual dipolar couplings and small-angle X-ray scattering. Proc Natl Acad Sci USA 2005;102:17002-7.  
Website: [4] U.S. positions on selected issues at the third negotiating session of the Framework Convention on Tobacco Control. Washington, D.C.: Committee on Government Reform, 2002. (Accessed March 4, 2002, at <http://www.house.gov/reform/cord.htm>.)

**Tables:** Submit tables on separate pages and number them consecutively using Arabic numerals. Provide a short descriptive title, column headings, and (if necessary) footnotes to make each table self-explanatory. Refer to tables in the text as Table 1, etc. Use Table 1, etc. in the table legends.

**Figures: General requirements:** All illustrations must be of reproduction-ready quality. They will be reduced in size to fit, whenever possible, the width of a single column. Lettering of all figures within the article should be uniform in style (preferably a sans serif typeface like Helvetica) and of sufficient size (ca. 8 pt.). Uppercase letters A, B, C, etc. should be used to identify parts of multi-part figures. Cite all figures in the text in numerical order. Indicate the approximate placement of each figure. Please supply for embedded figures within the text body of the manuscript; figures in separate files.

**Halftone figures (grayscale and color)** should have a minimum resolution of 300 dpi and be of good contrast. Authors are encouraged to submit illustrations in color if necessary for their scientific content. Publication of color figures is provided free of charge both in online and print editions.

**Line drawings** must be of reproduction-ready quality. Please note that faint shading may be lost upon reproduction. When drawing bar graphs, use patterning instead of grey scales. Lettering of all figures should be uniform in style. A resolution of 1200 dpi is recommended.

**Figure legends:** Provide a short descriptive title and a legend to make each figure self-explanatory on separate pages. Explain all symbols used in the figures. Remember to use the same abbreviations as in the text body.

**Permissions for the reuse of figures:** It is the authors' responsibility to obtain permission to reproduce original or modified material that has been previously published. If you want to use material published by De Gruyter, please check the instructions on our website: <http://www.degruyter.com/dg/page/20/rights-permissions>. If you are requesting rights for figures published by other publishers, you need to check the publisher's website for standard forms and conditions.

**Supplementary Material:** Authors are encouraged to submit supplementary materials in addition to the manuscript files. The data/information will be available online on the journal's website.

**Offprints:** The electronic files of typeset articles in Adobe Acrobat PDF format are provided free of charge; corresponding authors receive notification that their article has been published online.

**Template:** Please use the following link to access the LaTeX and Word templates for the Nanophotonics site. <https://www.degruyter.com/page/59>

**Please contact the Editorial Office with any further questions:**

Drs. Ing Dennis Couwenberg  
Editorial Office Nanophotonics

Tel. +34-655-905 790

E-mail: [dcouwenberg@nanophotonics-journal.com](mailto:dcouwenberg@nanophotonics-journal.com)
